# Supplementary material for: The genetic basis of cytoplasmic male sterility and fertility restoration in wheat
Source: PubMed Central journal article supplement (PMC7884431; doi:10.1038/s41467-021-21225-0), 2021-02-15
Supplement: 41467_2021_21225_MOESM1_ESM.pdf [file 41467_2021_21225_MOESM1_ESM.pdf]

**The genetic basis of cytoplasmic male sterility and fertility restoration in  
wheat**

Melonek *et al.*

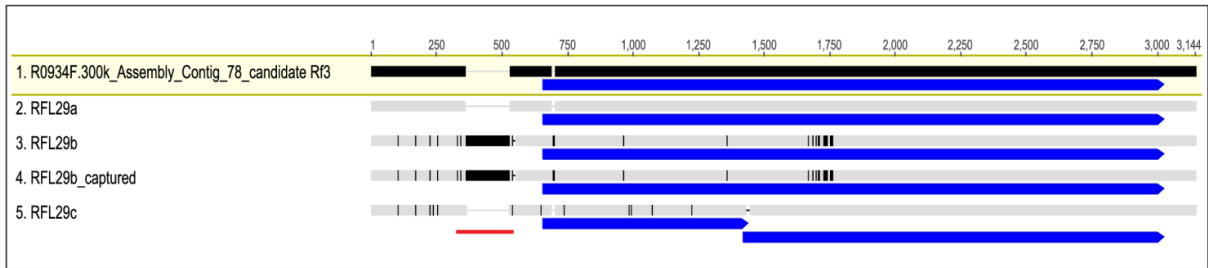

**Supplementary Figure 1.** Sequence alignment. Analysis of sequences present in RFL group 29. In this visualization, each vertical bar in the aligned sequences represents a mismatch compared to R0934F.300k\_Assembly\_Contig\_78 sequence that was selected as *Rf3* candidate. An insertion in the putative 5' UTR of *RFL29b* is underlined in red and the open reading frames are shown in blue. Source data are provided as a Source Data file.

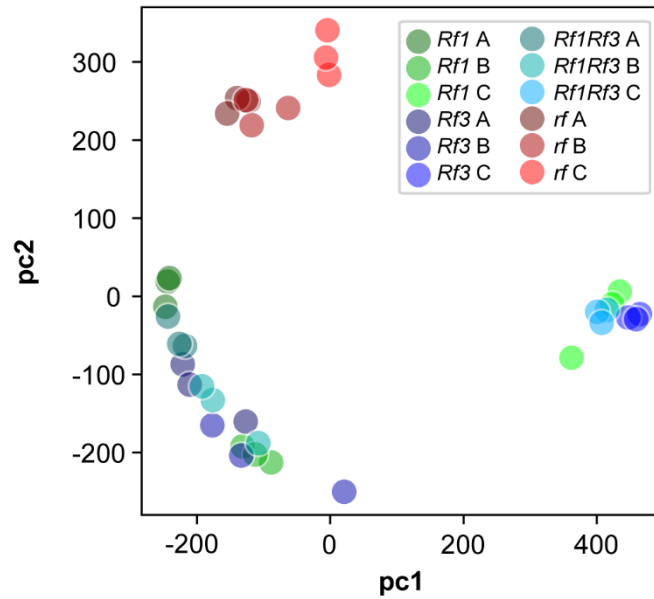

**Supplementary Figure 2.** Principal components analysis (PCA) of the read counts for each transcript from anthers collected at three developmental stages: early heading (A), early-mid anthesis (B) and late anthesis (C) in the fertile and sterile plants.  $n=3$ . The first principal component (pc1, 39% of variance) distinguishes the differentiation between the three stages in the fertile genotypes and the second principal component (pc2, 17% of variance) distinguishes strong differentiation between the fertile and sterile genotypes. *Rf1* corresponds to R0932E, *Rf3* to R0946E, *Rf1Rf3* to R0934F and *rf* to Fielder\*CMS line. RNA-Seq counts and Python code used for plotting the figure are available from Dryad (<https://doi.org/10.5061/dryad.6djh9w10d>).

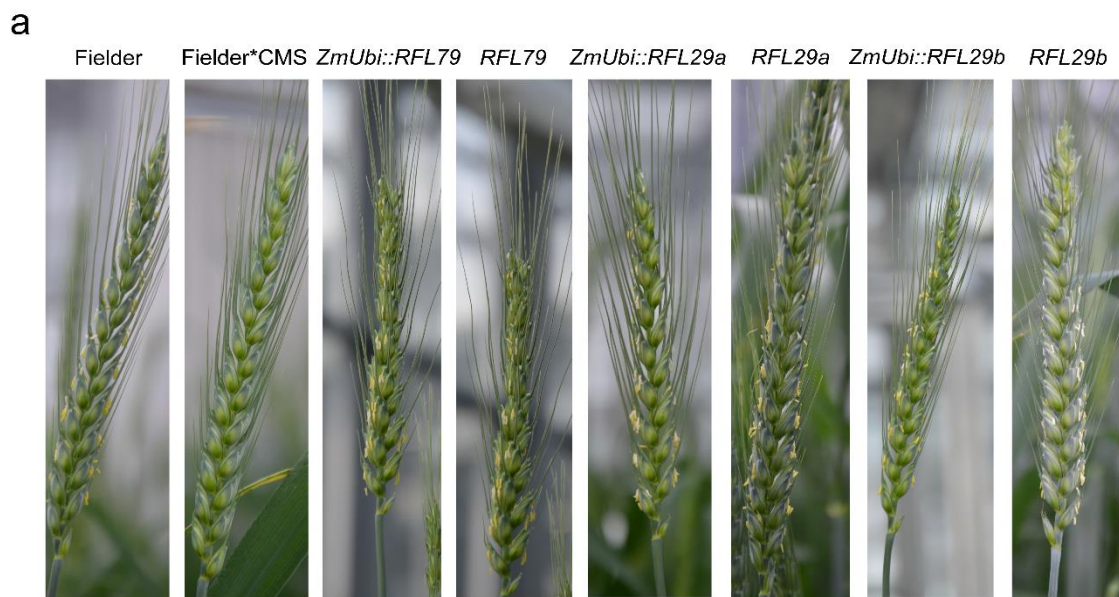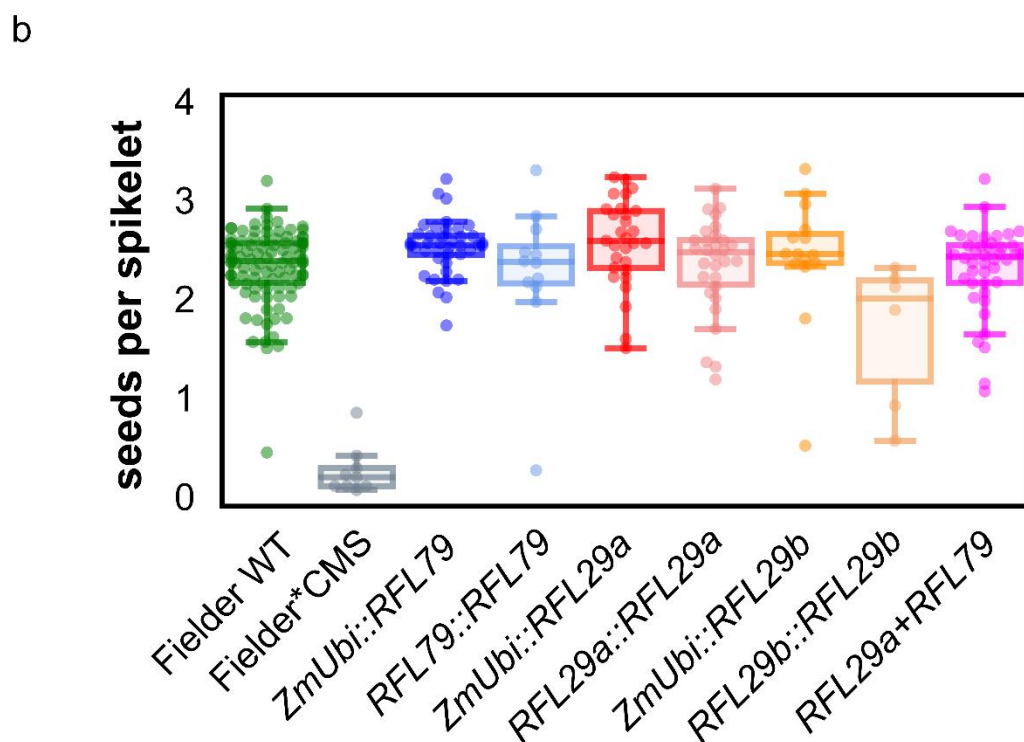

**Supplementary Figure 3.** Analysis of the fertility restoration in the *Rf1* and *Rf3* transformants compared to Fielder\*CMS line. (a) Examples of the flowering phenotype of the transgenic plants. (b) Fertility restoration scores. The fertility scores were calculated by dividing the total number of seeds threshed from a spike by the number of counted spikelets. Centre line, median; box limits, upper and lower quartiles; whiskers, 1.5x interquartile range. Number of spikelets analyzed per line: Fielder WT n=20777, Fielder\*CMS n=2386, *ZmUbiRFL79* n=5930, *RFL79* n=1660, *ZmUbiRFL29a* n=3819, *RFL29a* n=3633, *ZmUbiRFL29b* n=1934, *RFL29b* n=809, *RFL29a+RFL79* n=6943. Source data are provided as a Source Data file.

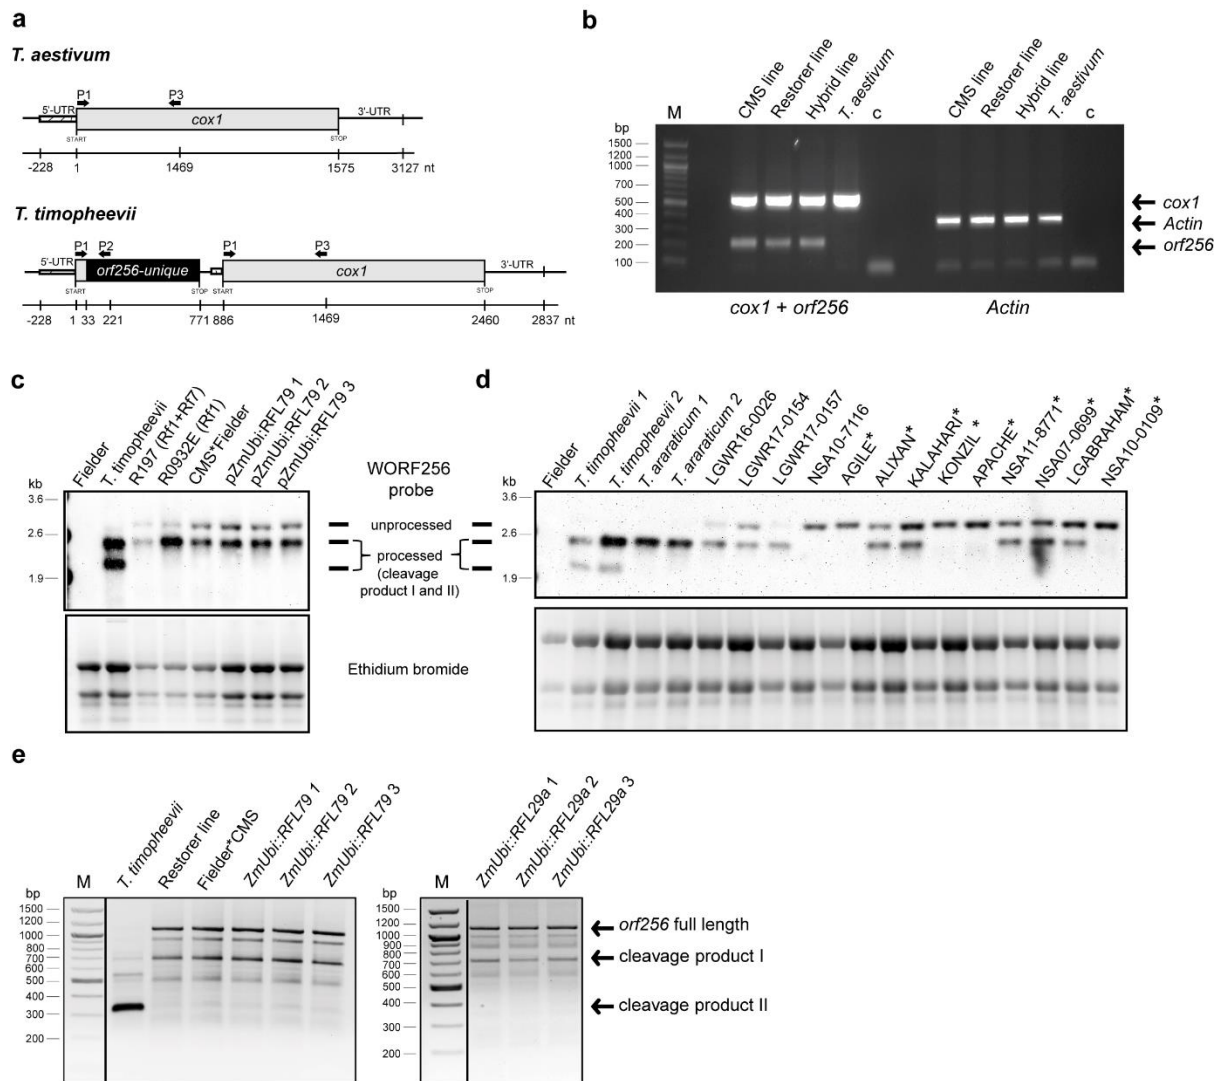

**Supplementary Figure 4.** Expression and processing of *orf256* in Fielder\*CMS and *RFL79* and *RFL29a* transformants. **(a)** Schematic overview of the *orf256* genomic structure. **(b)** RT-PCR analysis of the expression of *orf256* in different wheat genotypes. The experiment was performed three times and similar results were obtained. **(c)** Northern blot analysis of *orf256* processing in mitochondria of several wheat accessions. The probe used to detect *orf256* was prepared as described previously<sup>1</sup>. The experiment was performed twice and similar results were obtained. **(d)** Survey of available T-CMS accessions in regard to *orf256* processing. Several sterile lines including Alixan, Kalahari, Apache show processing of *orf256* at cleavage site I that does not correlate with the restoration of fertility. Cleavage site II was detected only in *T. timopheevii*. Asterisks indicate CMS lines. M - RNA Markers. The experiment was performed twice and similar results were obtained. **(e)** Mapping the 5'-ends of *orf256* RNA by 5'RACE analysis. Cleavage product I of *orf256* was amplified in CMS as well restorer lines. Cleavage product II was amplified only in *T. timopheevii*. The cleavage of *orf256* does not correlate with the restoration phenotype observed for the *RFL79* and *RFL29a* transformants. The amplification products were obtained with Gene Specific Primer 1 (GSP1) listed in Supplementary Table 6. M - 100 bp DNA ladder. The experiment was performed three times and similar results were obtained. Source data underlying Supplementary Figure 4b-e are provided as a Source Data file.

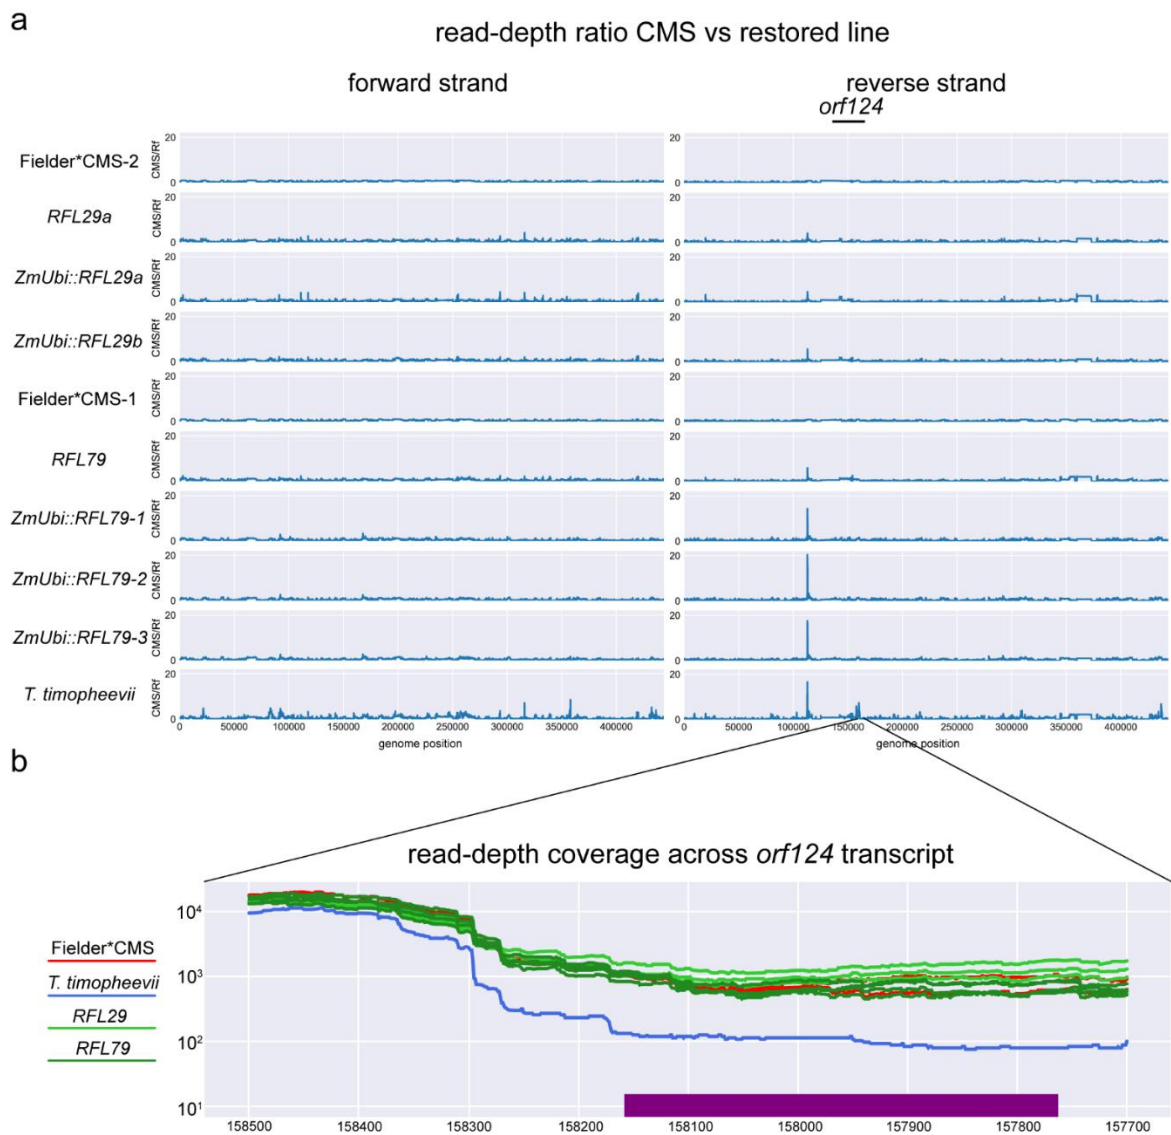

**Supplementary Figure 5.** Analysis of expression pattern of *orf124* between sterile and restored genotypes. **(a)** Ratio of strand-specific RNA-Seq coverage from Fielder\*CMS lines (sterile) and restored (fertile) samples plotted across the *T. timopheevii* mitochondrial genome (NCBI accession number NC\_022714.1) for forward and reverse strand is shown. The genomic region carrying *orf124* (reverse strand) is indicated at the top of the plots. **(b)** Normalised RNA-Seq coverage in the *orf124* region across the accessions. RNA-Seq counts and Python code used for plotting **(a)** and **(b)** are available from Dryad (<https://doi.org/10.5061/dryad.6djh9w10d>).

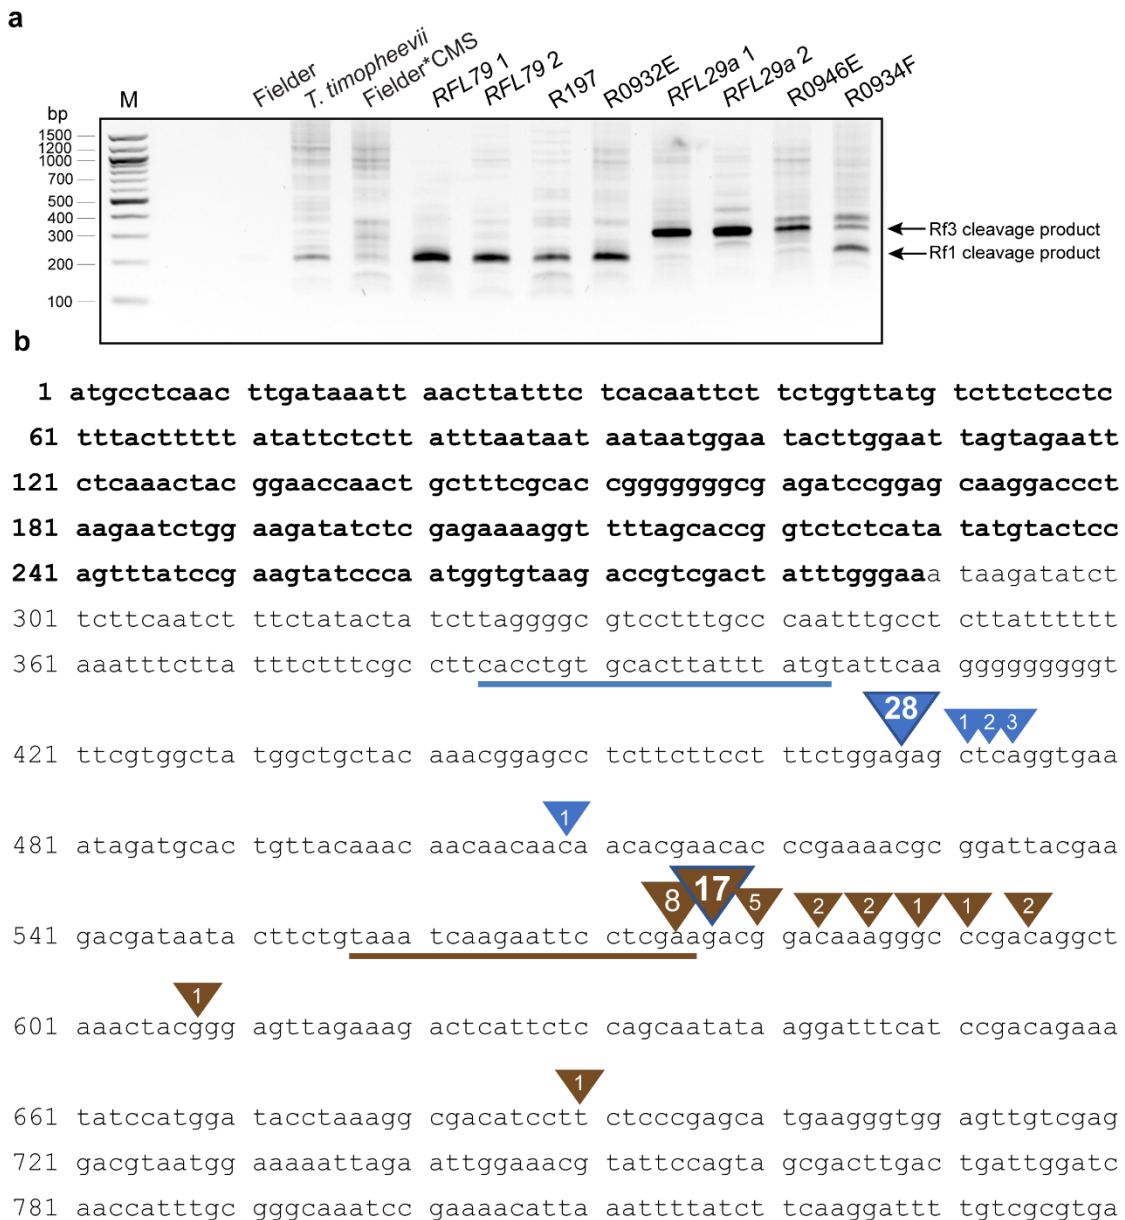

**Supplementary Figure 6.** Mapping cleavage sites of *orf279* RNA by 5'-RACE approach. (a) 5'-RACE reaction products separated on 1.5% agarose gel and stained with ethidium bromide. For amplification the Gene Specific Primer 1 (GSP1) listed in Supplemental Table 8 was used. M: 100 bp NEB ladder. The experiment was performed three times and similar results were obtained. (b) Position of mapped cleavage sites within *orf279* RNA identified by sequencing of the obtained 5'-RACE products. The sequence encoding the first 96 amino acid residues at the N-terminus of Orf279 corresponding to the ATP synthase subunit 8 encoded by the mitochondrial *atp8* gene is shown in bold. The blue and brown triangles point to cleavage sites identified in *RFL29a* and *RFL79* transformants, respectively. The numbers within the triangles indicate the number of clones sequenced to contain RNA starting at this position. The predicted binding sites for *RFL29a* and *RFL79* are underlined in blue and brown, respectively. Source data underlying Supplementary Figure 6a are provided as a Source Data file.

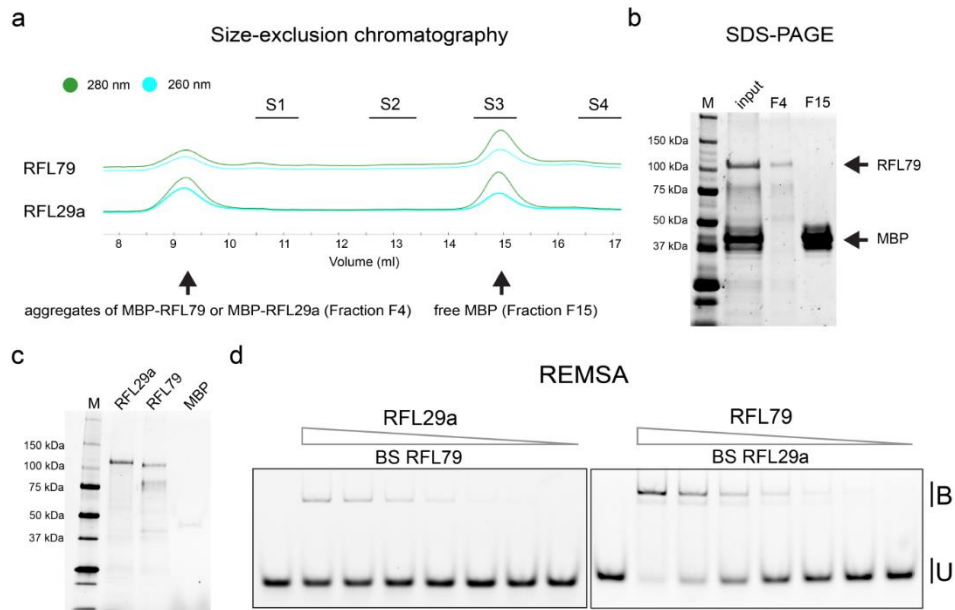

**Supplementary Figure 7.** *In vitro* RNA-binding assays with recombinant RFL29a and RFL79 proteins. The RFL29a and RFL79 proteins were expressed as N-terminal fusions with Maltose Binding Protein (MBP) and Histidine-tag (His-tag). The recombinant proteins were purified on Ni-NTA columns (Bio-Rad) by gravity flow. **(a)** To analyse the state of the recombinant proteins (ratio of soluble fraction vs aggregates), the purified proteins were subjected to size-exclusion chromatography (SEC) using an ENrich™ SEC 650 column (Bio-Rad) on an NGC Chromatography System (Bio-Rad). The size of separated proteins detected by 280 nm absorbance was estimated using size exclusion standards (Bio-Rad): thyroglobulin Mr 670,000 (S1), bovine  $\gamma$ -globulin Mr 158,000 (S2), chicken ovalbumin Mr 44,000 (S3), equine myoglobin Mr 17,000 (S4). The approximate retention of the standards is indicated. The SEC analysis revealed the presence of high-molecular weight protein aggregates of RFL29a or RFL79 eluting first followed by protein fractions with estimated molecular weight similar to free MBP. The experiment was performed once. **(b)** The fractions collected during the run with a BioFrac fraction collector (Bio-Rad) were separated on a Mini-PROTEAN TGX Stain-Free gel (Bio-Rad). SDS-PAGE confirmed that the protein aggregates seen during the SAC analysis represent recombinant RFL79 protein. Input - Ni-NTA purified RFL79 protein fraction before SEC analysis, F4 - fraction containing high-molecular weight aggregates, F15 - fraction containing the low molecular weight protein. M - Molecular mass standard. The experiment was performed once. **(c)** SDS-PAGE of protein fractions used in all REMSA experiments. The experiment was performed once. **(d)** To study the specificity of RNA binding, the purified RFL29a and RFL79 were incubated with each other's predicted RNA targets. Both proteins bind to the other's RNA target as shown by REMSA assay. Serial protein dilutions ranging from 1.8  $\mu$ M to 28.1 nM were used for RFL29a and RFL79. The final concentration of the RNA probes was 1 nM. B = bound - RNA-protein complex, U = unbound - free RNA probe. On each gel, the left lane acts as a marker for unbound probe. The experiment was performed three times and similar results were obtained. Source data are provided as a Source Data file.



a

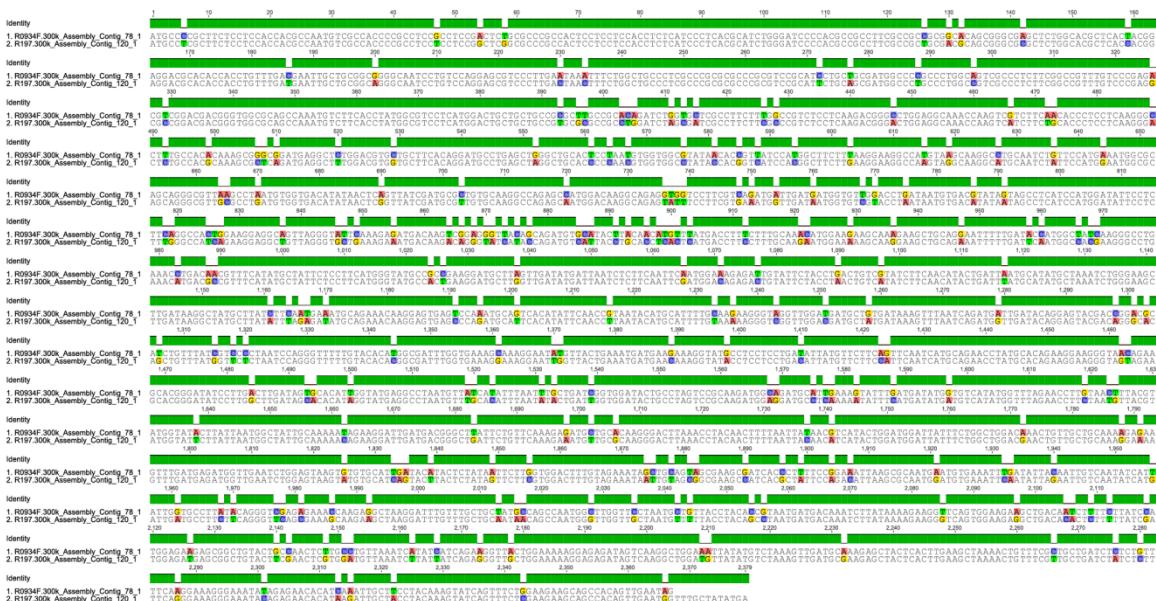

b

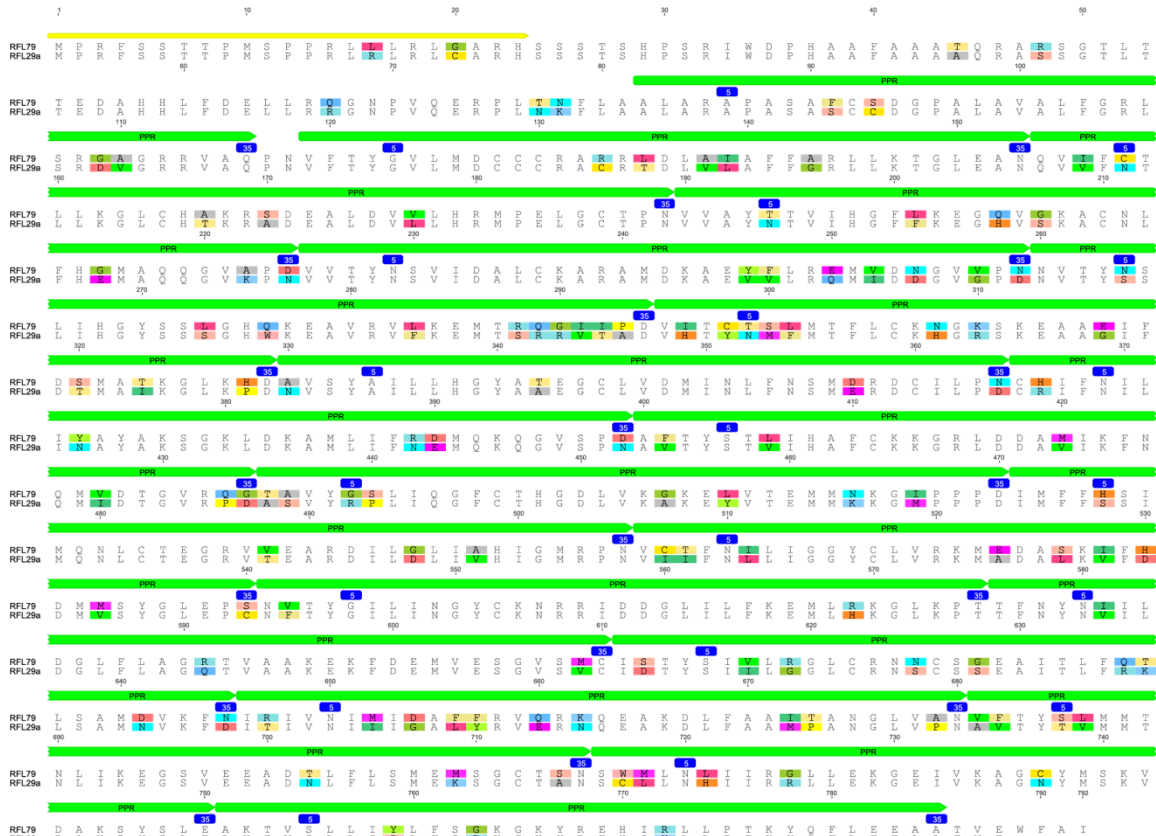

**Supplementary Figure 8.** Comparison between *RFL79* (*Rfl* candidate) and *RFL29a* (*Rf3*) candidate DNA sequences (a) and encoded protein sequences (b). The sequence of mitochondrial targeting peptide is highlighted by yellow box, PPR motifs by green boxes, and amino acid residues at position 5 and 35 of each PPR motif by blue boxes. Source data are provided as a Source Data file.

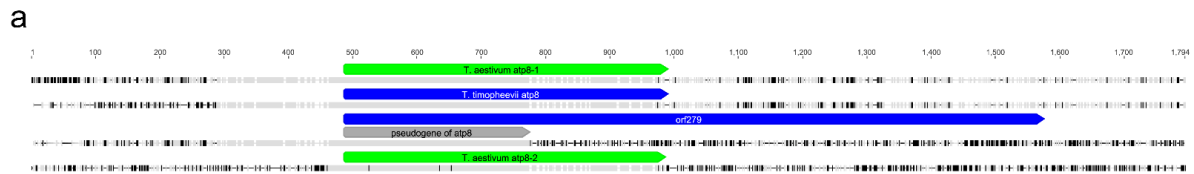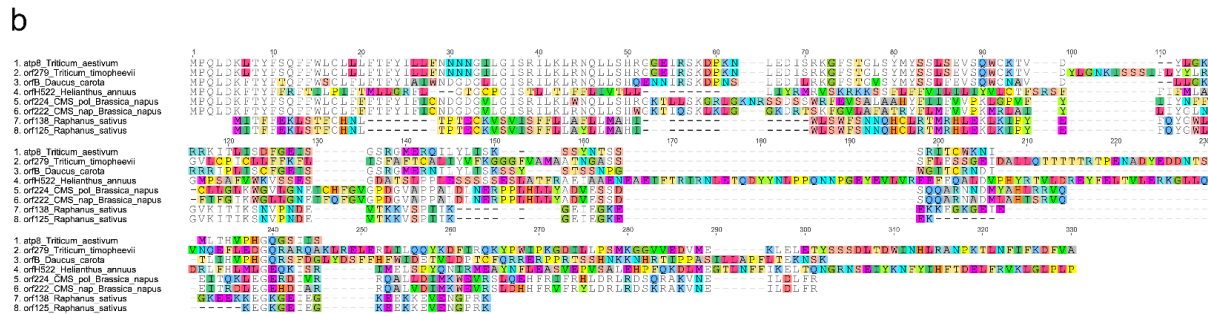

**Supplementary Figure 9.** *Orf279* as genetic basis of cytoplasmic male sterility in wheat T-CMS plants. **(a)** Alignment of the promoter and 5' UTR regions of *T. aestivum atp8-1* gene, *T. timopheevii* full-length *atp8* gene, *orf279*, and *T. aestivum atp8-2* gene (GenBank accession numbers: AP013106/ NC\_022714 and AP008982). **(b)** Phylogenetic relationships between chimeric *atp8*-orfs related to CMS in plants. Alignment was generated with Geneious (<https://www.geneious.com>) and tree with FastTree. The GenBank accession numbers for the CMS-genes are as follow: *orf138*<sup>2</sup> (P68513.1), *orf125*<sup>3</sup> (AB015327), *orfB*<sup>4</sup> (AB033490), *orf224* and *orf222*<sup>5</sup> (U10423 and U10428), *orfH522*<sup>6</sup> (CAA37614.1), *orf279* (this manuscript), *atp8* (NC\_022714). Source data are provided as a Source Data file.

**Supplementary Table 1.** Markers identified in genetic screen as associated with fertility restoration conferred either by *Rf1* or *Rf3* locus in wheat.

| Marker ID  | Restorer | SNP | location | strand | START    | STOP     | Sequence                                                                    |
|------------|----------|-----|----------|--------|----------|----------|-----------------------------------------------------------------------------|
| cfn0522096 | Rf1      | G/C | chr1A    | [-]    | 14505133 | 14505203 | ATGCAAAGTAGTACTCGTAGAGAGTTAACACAGAC[G/C]AGTGATTTATTGGGTGGTATTCTACTTGATATTTG |
| cfn0527067 | Rf1      | A/G | chr1A    | [-]    | 15346055 | 15346425 | GACAATATGATTCACCCTAGATCCTTCACCTTACA[A/G]TTCGAAAAAATAAAAAGAACAAAAGTAATTTGACA |
| cfn1249269 | Rf3      | A/G | chr1B    | [+]    | 17780363 | 17780422 | CGTTTAAAAGAACACAAATGTGGCCCTAGTGATCA[A/G]GTACACATATTGTACCTCTTTGAATCTTACTTA   |
| BS00090770 | Rf3      | T/C | chr1B    | [-]    | 20589170 | 20589229 | TAGCCGTAGGTCGTAGCACATAGCCGTTTA[T/C]GTAATGCATAGTTGTCCGAAGGAATGTTTC           |

**Supplementary Table 2.** RFL genes identified in the *Rfl* and *Rf3* genomic regions in the IWGSC RefSeqv1.0 genome of Chinese Spring.

| Interval                   | # RFL   | Gene name            | Location | START    | STOP     | Strand | Encoded protein                                   | Protein length (aa) | Predicted location <sup>7</sup> | Comment     |
|----------------------------|---------|----------------------|----------|----------|----------|--------|---------------------------------------------------|---------------------|---------------------------------|-------------|
| <i>Rfl</i> (14.5-15.3 Mbp) | RFL77   | TraesCS1A02G031600.1 | chr1A    | 14577582 | 14579933 | [+]    | Pentatricopeptide repeat-containing protein (PPR) | 784                 | m (0.853, mTP 20)               | full-length |
|                            | RFL105* | TraesCS1A02G031700.1 | chr1A    | 14584912 | 14587137 | [+]    | Pentatricopeptide repeat-containing protein (PPR) | 741                 | m (0.845, mTP 23)               | truncated   |
|                            |         | TraesCS1A02G031800.1 | chr1A    | 14589565 | 14594115 | [-]    | Protein kinase, putative                          |                     |                                 |             |
|                            |         | TraesCS1A02G031900.1 | chr1A    | 14603494 | 14615692 | [-]    | Protein kinase, putative                          |                     |                                 |             |
|                            |         | TraesCS1A02G032000.1 | chr1A    | 14744093 | 14748608 | [-]    | O-methyltransferase                               |                     |                                 |             |
|                            |         | TraesCS1A02G032100.1 | chr1A    | 14790721 | 14791908 | [-]    | Chalcone synthase                                 |                     |                                 |             |
|                            |         | TraesCS1A02G032200.1 | chr1A    | 14799110 | 14800511 | [-]    | O-methyltransferase                               |                     |                                 |             |
|                            |         | TraesCS1A02G032300.1 | chr1A    | 14838308 | 14839886 | [-]    | Chalcone synthase                                 |                     |                                 |             |
|                            |         | TraesCS1A02G032400.1 | chr1A    | 14857039 | 14858282 | [-]    | O-methyltransferase                               |                     |                                 |             |
|                            |         | TraesCS1A02G032500.1 | chr1A    | 14988541 | 14988944 | [+]    | alpha/beta-Hydrolases superfamily protein         |                     |                                 |             |
|                            |         | TraesCS1A02G032600.1 | chr1A    | 15186553 | 15188366 | [+]    | Anthocyanidin synthase                            |                     |                                 |             |
|                            |         | TraesCS1A02G032600.2 | chr1A    | 15177031 | 15177339 | [+]    | Anthocyanidin synthase                            |                     |                                 |             |
|                            |         | TraesCS1A02G032700.1 | chr1A    | 15190979 | 15195959 | [+]    | Replication protein A 70 kDa DNA-binding subunit  |                     |                                 |             |
| <i>Rf3</i> (17.8-20.6 Mbp) | RFL60   | TraesCS1B02G038200.1 | chr1B    | 17894195 | 17896564 | [-]    | Pentatricopeptide repeat-containing protein (PPR) | 790                 | m (0.910, mTP 25)               | full-length |
|                            | RFL164  | TraesCS1B02G038300.1 | chr1B    | 17964601 | 17966241 | [-]    | Pentatricopeptide repeat-containing protein (PPR) | 546                 | m (0.883, mTP 14) (pseudogene)  | truncated   |
|                            | RFL396  | TraesCS1B02G038400.1 | chr1B    | 18091427 | 18093253 | [-]    | Pentatricopeptide repeat-containing protein (PPR) | 608                 | none (pseudogene)               | truncated   |
|                            | RFL29b  | TraesCS1B02G038500.1 | chr1B    | 18116277 | 18118649 | [-]    | Pentatricopeptide repeat-containing protein (PPR) | 790                 | m (0.899, mTP 25)               | full-length |
|                            | RFL252  | TraesCS1B02G038600.1 | chr1B    | 18363378 | 18364565 | [-]    | Pentatricopeptide repeat-containing protein (PPR) | 396                 | none (pseudogene)               | truncated   |
|                            |         | TraesCS1B02G038700.1 | chr1B    | 18385559 | 18387800 | [-]    | Nitrate transporter 1.1                           |                     |                                 |             |
|                            |         | TraesCS1B02G038800.1 | chr1B    | 18419377 | 18423130 | [-]    | Protein kinase                                    |                     |                                 |             |
|                            |         | TraesCS1B02G038900.1 | chr1B    | 18570322 | 18571755 | [-]    | Cysteine protease                                 |                     |                                 |             |
|                            |         | TraesCS1B02G039000.1 | chr1B    | 18578571 | 18579939 | [+]    | Glycosyltransferase                               |                     |                                 |             |
|                            | RFL89   | TraesCS1B02G039100.1 | chr1B    | 18683381 | 18685732 | [+]    | Pentatricopeptide repeat-containing protein (PPR) | 783                 | m (0.936, mTP 18)               | full-length |

|         |                                                 |       |            |          |     |                                                   |         |                                   |             |
|---------|-------------------------------------------------|-------|------------|----------|-----|---------------------------------------------------|---------|-----------------------------------|-------------|
| RFL58   | TraesCS1B02G039200.1                            | chr1B | 18867715   | 18870069 | [+] | Pentatricopeptide repeat-containing protein (PPR) | 784     | m (0.874, mTP 19)                 | full-length |
|         | TraesCS1B02G039300.1                            | chr1B | 19018793   | 19020813 | [+] | Oligopeptidase A                                  |         |                                   |             |
|         | TraesCS1B02G039400.1                            | chr1B | 19,025,038 | 19025620 | [+] | Leucine-rich repeat protein kinase family protein |         |                                   |             |
|         | TraesCS1B02G039500.1                            | chr1B | 19038922   | 19043415 | [+] | Receptor protein kinase, putative                 |         |                                   |             |
|         | TraesCS1B02G039600.1                            | chr1B | 19047105   | 19051706 | [+] | Protein kinase, putative                          |         |                                   |             |
| RFL97f* | chr1B:R:19063406-19062072<br>TraesCS1B02G039625 | chr1B | 19061029   | 19063406 | [-] | Pentatricopeptide repeat-containing protein (PPR) | 445+363 | m (0.946, mTP 16)<br>(pseudogene) | truncated   |
| RFL97   | TraesCS1B02G039625                              | chr1B | 19073841   | 19076117 | [-] | Pentatricopeptide repeat-containing protein (PPR) | 759     | m (0.715, mTP 22)                 | full-length |
|         | TraesCS1B02G039800.1                            | chr1B | 19217861   | 19232577 | [-] | Receptor-like protein kinase                      |         |                                   |             |
|         | TraesCS1B02G039900.1                            | chr1B | 19314295   | 19314714 | [-] | Defensin                                          |         |                                   |             |
|         | TraesCS1B02G040000.1                            | chr1B | 19718626   | 19720046 | [-] | Chalcone synthase                                 |         |                                   |             |
|         | TraesCS1B02G040100.1                            | chr1B | 19779389   | 19780576 | [-] | Chalcone synthase                                 |         |                                   |             |
|         | TraesCS1B02G040200.1                            | chr1B | 19890445   | 19891967 | [-] | Chalcone synthase                                 |         |                                   |             |
|         | TraesCS1B02G040300.1                            | chr1B | 19950229   | 19951416 | [-] | Chalcone synthase                                 |         |                                   |             |
|         | TraesCS1B02G040400.1                            | chr1B | 20015264   | 20017794 | [-] | O-methyltransferase-like protein                  |         |                                   |             |
|         | TraesCS1B02G040500.1                            | chr1B | 20046035   | 20047787 | [-] | Chalcone synthase                                 |         |                                   |             |
|         | TraesCS1B02G040600.1                            | chr1B | 20059838   | 20061082 | [-] | O-methyltransferase                               |         |                                   |             |
|         | TraesCS1B02G040700.1                            | chr1B | 20167177   | 20169022 | [+] | Anthocyanidin synthase                            |         |                                   |             |
|         | TraesCS1B02G040800.1                            | chr1B | 20172786   | 20177655 | [+] | Replication protein A 70 kDa DNA-binding subunit  |         |                                   |             |

**Supplementary Table 3.** Summary of plant genomes used in the study.

| No. | Tribe         | Species                        | Cultivar        | Website                                                                                                                                                   | References | Identified RF-like PPR proteins |
|-----|---------------|--------------------------------|-----------------|-----------------------------------------------------------------------------------------------------------------------------------------------------------|------------|---------------------------------|
| 1   | Triticeae     | <i>Aegilops tauschii</i> (1)   | AL8/78          | <a href="http://plants.ensembl.org/Aegilops_tauschii/Info/Index">http://plants.ensembl.org/Aegilops_tauschii/Info/Index</a>                               | 8          | 46                              |
| 2   |               | <i>Aegilops tauschii</i> (2)   |                 | <a href="http://wheat-urgi.versailles.inra.fr/Seq-Repository/Assemblies">http://wheat-urgi.versailles.inra.fr/Seq-Repository/Assemblies</a>               | 8          | 31                              |
| 3   |               | <i>Aegilops speltoides</i>     |                 | <a href="http://wheat-urgi.versailles.inra.fr/Seq-Repository/Assemblies">http://wheat-urgi.versailles.inra.fr/Seq-Repository/Assemblies</a>               | 9          | 20                              |
| 4   |               | <i>Aegilops sharonensis</i>    |                 | <a href="http://wheat-urgi.versailles.inra.fr/Seq-Repository/Assemblies">http://wheat-urgi.versailles.inra.fr/Seq-Repository/Assemblies</a>               | 9          | 32                              |
| 5   |               | <i>Triticum aestivum</i>       |                 | <a href="http://plants.ensembl.org/Triticum_aestivum/Info/Index">http://plants.ensembl.org/Triticum_aestivum/Info/Index</a>                               | 9          | 98                              |
| 6   |               | <i>Triticum durum</i>          | cv. Cappeli     | <a href="http://wheat-urgi.versailles.inra.fr/Seq-Repository/Assemblies">http://wheat-urgi.versailles.inra.fr/Seq-Repository/Assemblies</a>               | 9          | 30                              |
| 7   |               | <i>Triticum durum</i>          | cv. Strongfiled | <a href="http://wheat-urgi.versailles.inra.fr/Seq-Repository/Assemblies">http://wheat-urgi.versailles.inra.fr/Seq-Repository/Assemblies</a>               | 9          | 30                              |
| 8   |               | <i>Triticum monococcum</i>     |                 | <a href="http://wheat-urgi.versailles.inra.fr/Seq-Repository/Assemblies">http://wheat-urgi.versailles.inra.fr/Seq-Repository/Assemblies</a>               | 10         | 12                              |
| 9   |               | <i>Triticum turgidum</i>       |                 | <a href="http://www.ncbi.nlm.nih.gov/bioproject/PRJNA191054">http://www.ncbi.nlm.nih.gov/bioproject/PRJNA191054</a>                                       | 11         | 25                              |
| 10  |               | <i>Triticum urartu</i>         |                 | <a href="http://archive.gramene.org/Triticum_urartu/Info/Annotation/">http://archive.gramene.org/Triticum_urartu/Info/Annotation/</a>                     | 12         | 24                              |
| 11  |               | <i>Hordeum vulgare</i>         | Barke           | <a href="http://pgsb.helmholtz-muenchen.de/plant/barley/index.jsp">http://pgsb.helmholtz-muenchen.de/plant/barley/index.jsp</a>                           | 13         | 13                              |
| 12  |               | <i>Hordeum vulgare</i>         | Morex           | <a href="http://pgsb.helmholtz-muenchen.de/plant/barley/index.jsp">http://pgsb.helmholtz-muenchen.de/plant/barley/index.jsp</a>                           | 13         | 12                              |
| 13  |               | <i>Hordeum vulgare</i>         | Bowman          | <a href="http://pgsb.helmholtz-muenchen.de/plant/barley/index.jsp">http://pgsb.helmholtz-muenchen.de/plant/barley/index.jsp</a>                           | 13         | 13                              |
| 14  |               | <i>Hordeum vulgare</i>         | var. distichum  | <a href="http://plants.ensembl.org/Hordeum_vulgare/Info/Index">http://plants.ensembl.org/Hordeum_vulgare/Info/Index</a>                                   | 13         | 0                               |
| 15  |               | <i>Lolium perenne</i>          | P226/135/1      | <a href="http://www.ncbi.nlm.nih.gov/nuccore/GAYX00000000">http://www.ncbi.nlm.nih.gov/nuccore/GAYX00000000</a>                                           | 15         | 2                               |
| 16  |               | <i>Secale cereale</i>          |                 | <a href="http://pgsb.helmholtz-muenchen.de/plant/rye/index.jsp">http://pgsb.helmholtz-muenchen.de/plant/rye/index.jsp</a>                                 | 15         | 0                               |
| 17  | Oryzeae       | <i>Oryza sativa</i>            |                 | <a href="http://phytozome.jgi.doe.gov/pz/portal.html#!bulk?org=Org_Osativa">http://phytozome.jgi.doe.gov/pz/portal.html#!bulk?org=Org_Osativa</a>         | 16         | 14                              |
| 18  |               | <i>Oryza sativa japonica</i>   |                 | <a href="http://plants.ensembl.org/Oryza_sativa/Info/Index">http://plants.ensembl.org/Oryza_sativa/Info/Index</a>                                         | 17         | 14                              |
| 19  |               | <i>Oryza indica</i>            | Nipponbare      | <a href="http://plants.ensembl.org/Oryza_indica/Info/Index">http://plants.ensembl.org/Oryza_indica/Info/Index</a>                                         | 18         | 18                              |
| 20  |               | <i>Oryza sativa Nipponbare</i> |                 | <a href="http://rapdb.dna.affrc.go.jp/index.html">http://rapdb.dna.affrc.go.jp/index.html</a>                                                             | 17         | 14                              |
| 21  |               | rice cultivar 'Kasalath'       | Kasalath        | <a href="http://rapdb.dna.affrc.go.jp/index.html">http://rapdb.dna.affrc.go.jp/index.html</a>                                                             | 18         | 11                              |
| 22  |               | <i>Oryza barthii</i>           |                 | <a href="http://plants.ensembl.org/Oryza_barthii/Info/Index">http://plants.ensembl.org/Oryza_barthii/Info/Index</a>                                       | 19         | 13                              |
| 23  |               | <i>Oryza brachyantha</i>       |                 | <a href="http://plants.ensembl.org/Oryza_brachyantha/Info/Index">http://plants.ensembl.org/Oryza_brachyantha/Info/Index</a>                               | 20         | 4                               |
| 24  |               | <i>Oryza glaberrima</i>        |                 | <a href="http://plants.ensembl.org/Oryza_glaberrima/Info/Index">http://plants.ensembl.org/Oryza_glaberrima/Info/Index</a>                                 | 21         | 2                               |
| 25  |               | <i>Oryza glumaepatula</i>      |                 | <a href="http://plants.ensembl.org/Oryza_glumaepatula/Info/Index">http://plants.ensembl.org/Oryza_glumaepatula/Info/Index</a>                             | 19         | 12                              |
| 26  |               | <i>Oryza meridionalis</i>      |                 | <a href="http://plants.ensembl.org/Oryza_meridionalis/Info/Index">http://plants.ensembl.org/Oryza_meridionalis/Info/Index</a>                             | 19         | 15                              |
| 27  |               | <i>Oryza nivara</i>            |                 | <a href="http://plants.ensembl.org/Oryza_nivara/Info/Index">http://plants.ensembl.org/Oryza_nivara/Info/Index</a>                                         | 19         | 13                              |
| 28  |               | <i>Oryza punctata</i>          |                 | <a href="http://plants.ensembl.org/Oryza_punctata/Info/Index">http://plants.ensembl.org/Oryza_punctata/Info/Index</a>                                     | 19         | 7                               |
| 29  |               | <i>Oryza rufipogon</i>         |                 | <a href="http://plants.ensembl.org/Oryza_rufipogon/Info/Index">http://plants.ensembl.org/Oryza_rufipogon/Info/Index</a>                                   | 19         | 12                              |
| 30  | Brachypodieae | <i>Brachypodium distachyon</i> |                 | <a href="http://phytozome.jgi.doe.gov/pz/portal.html#!bulk?org=Org_Bdistachyon">http://phytozome.jgi.doe.gov/pz/portal.html#!bulk?org=Org_Bdistachyon</a> | 22         | 11                              |

|    |               |                        |        |                                                                                                                                                     |                       |                   |
|----|---------------|------------------------|--------|-----------------------------------------------------------------------------------------------------------------------------------------------------|-----------------------|-------------------|
| 31 | Eragrostideae | <i>Eragrostis tef</i>  |        | <a href="http://www.tef-research.org/index.html">http://www.tef-research.org/index.html</a>                                                         | <sup>23</sup>         | 33                |
| 32 | Poniceae      | <i>Setaria italica</i> |        | <a href="http://phytozome.jgi.doe.gov/pz/portal.html#!bulk?org=Org_Sitalica">http://phytozome.jgi.doe.gov/pz/portal.html#!bulk?org=Org_Sitalica</a> | <sup>24</sup>         | 15                |
| 33 | Andropogoneae | <i>Sorghum bicolor</i> | BTx623 | <a href="http://plants.ensembl.org/Sorghum_bicolor/Info/Index">http://plants.ensembl.org/Sorghum_bicolor/Info/Index</a>                             | <sup>25</sup>         | 20                |
| 34 | Andropogoneae | <i>Sorghum bicolor</i> | BTx623 | <a href="http://www.ncbi.nlm.nih.gov/">http://www.ncbi.nlm.nih.gov/</a>                                                                             | <sup>25</sup>         | 11                |
| 35 | Andropogoneae | <i>Zea mays</i>        | B73    | <a href="http://plants.ensembl.org/Zea_mays/Info/Index">http://plants.ensembl.org/Zea_mays/Info/Index</a>                                           | <sup>26</sup>         | 6                 |
|    |               |                        |        |                                                                                                                                                     | Total                 | 633               |
|    |               |                        |        |                                                                                                                                                     | Reference RFLs        | <sup>27</sup> 49  |
|    |               |                        |        |                                                                                                                                                     | Sorghum WGS data sets | <sup>28</sup> 517 |
|    |               |                        |        |                                                                                                                                                     | Total                 | 1199              |

**Supplementary Table 4.** Summary of the RFL capture experiment.

| # | Restoration status | Accession name              | Number of assembled contigs composed of > 100 reads | Number of identified RFL ORFs >210 aa* | Number of orthologous groups with at least one RFL from the accession | Number of RFL ORFs > 350 aa assigned to orthologous groups |
|---|--------------------|-----------------------------|-----------------------------------------------------|----------------------------------------|-----------------------------------------------------------------------|------------------------------------------------------------|
| 1 | weak Rf3 restorer  | Chinese Spring              | 204                                                 | 216                                    | 205                                                                   | 161                                                        |
| 2 | maintainer         | Anapurna                    | 211                                                 | 221                                    | 202                                                                   | 156                                                        |
| 3 | maintainer         | Fielder                     | 231                                                 | 223                                    | 212                                                                   | 138                                                        |
| 4 | <i>Rf1</i>         | R197                        | 219                                                 | 241                                    | 219                                                                   | 174                                                        |
| 5 | <i>Rf1</i>         | R0932E                      | 221                                                 | 245                                    | 221                                                                   | 183                                                        |
| 6 | <i>Rf3</i>         | R0946E                      | 239                                                 | 262                                    | 237                                                                   | 171                                                        |
| 7 | <i>Rf3+RF1</i>     | R0934F                      | 223                                                 | 237                                    | 215                                                                   | 174                                                        |
| 8 | <i>Rf3</i>         | Primepi                     | 226                                                 | 234                                    | 215                                                                   | 162                                                        |
| 9 | <i>Rf1</i>         | <i>Triticum timopheevii</i> | 138                                                 | 143                                    | 129                                                                   | 114                                                        |
|   | Total              |                             | 1912                                                | 2022                                   | 397 (non-redundant)                                                   | 1433                                                       |



**Supplementary Table 5.** Selection of candidate RFL groups based on restoring status of analysed wheat accessions and location within a given interval.

Selection of candidate RFL groups based on restoring status of analysed wheat accessions and location within the *Rf1* interval.

| RFL gene | Protein size (aa) | Gene located within <i>Rf1</i> interval ( <i>in silico</i> mapping with tblastn) | Gene located within <i>Rf1</i> mapping interval (genetic mapping (nb of markers)) | Restoring genotype |          |                     |        |                     |         |                         |                             |
|----------|-------------------|----------------------------------------------------------------------------------|-----------------------------------------------------------------------------------|--------------------|----------|---------------------|--------|---------------------|---------|-------------------------|-----------------------------|
|          |                   |                                                                                  |                                                                                   | Maintainer         |          | <i>Rf1</i> restorer |        | <i>Rf3</i> restorer |         | <i>Rf1</i> + <i>Rf3</i> | <i>Rf1</i> restorer         |
|          |                   |                                                                                  |                                                                                   | Chinese Spring     | Anapurna | R197                | R0932E | R0946E              | Primepi | R0934F                  | <i>Triticum timopheevii</i> |
| RFL1     | 988               | no                                                                               | n.a.                                                                              | 0                  | 0        | 1*                  | 1      | 0                   | 0       | 0                       | 0                           |
| RFL56    | 804               | no                                                                               | n.a.                                                                              | 0                  | 0        | 1                   | 1*     | 0                   | 0       | 0                       | 1                           |
| RFL59    | 813               | no                                                                               | n.a.                                                                              | 0                  | 0        | 1                   | 2      | 0                   | 0       | 0                       | 1                           |
| RFL73    | 813               | no                                                                               | n.a.                                                                              | 0                  | 0        | 1                   | 1      | 0                   | 0       | 0                       | 1                           |
| RFL74    | 813               | no                                                                               | n.a.                                                                              | 0                  | 0        | 1                   | 1      | 0                   | 0       | 1                       | 0                           |
| RFL79    | 808               | no                                                                               | yes (4)                                                                           | 0                  | 0        | 1                   | 1      | 0                   | 0       | 1                       | 1                           |
| RFL93    | 775               | no                                                                               | no                                                                                | 0                  | 0        | 1                   | 1      | 0                   | 0       | 0                       | 0                           |
| RFL104   | 757               | yes                                                                              | yes (4)                                                                           | 0                  | 0        | 1                   | 1      | 0                   | 0       | 1                       | 1                           |
| RFL129*  | 693               | no                                                                               | no                                                                                | 0                  | 0        | 1                   | 1      | 0                   | 0       | 1                       | 0                           |
| RFL185*  | 524               | yes                                                                              | yes (4)                                                                           | 0                  | 0        | 1                   | 1      | 0                   | 0       | 1                       | 1                           |
| RFL268*  | 382               | yes                                                                              | yes (4)                                                                           | 0                  | 0        | 1                   | 1      | 0                   | 0       | 1                       | 1                           |

\* - non-functional sequence truncated or disrupted by a frameshift.

Selection of candidate RFL groups based on restoring status of analysed wheat accessions and location within the *Rf3* interval.

| RFL gene | Protein size (aa) | Gene located within <i>Rf3</i> interval ( <i>in silico</i> mapping with tblastn) | Gene located within <i>Rf3</i> mapping interval (genetic mapping (nb of markers)) | Restoring genotype            |            |                     |        |                     |         |                         |                             |            |
|----------|-------------------|----------------------------------------------------------------------------------|-----------------------------------------------------------------------------------|-------------------------------|------------|---------------------|--------|---------------------|---------|-------------------------|-----------------------------|------------|
|          |                   |                                                                                  |                                                                                   | weak <i>Rf3</i> restorer line | Maintainer | <i>Rf1</i> restorer |        | <i>Rf3</i> restorer |         | <i>Rf1</i> + <i>Rf3</i> | <i>Rf1</i> restorer         | Maintainer |
|          |                   |                                                                                  |                                                                                   | Chinese Spring                | Anapurna   | R197                | R0932E | R0946E              | Primepi | R0934F                  | <i>Triticum timopheevii</i> | Fielder    |
| RFL67    | 820               | yes                                                                              | yes                                                                               | 0                             | 0          | 0                   | 0      | 1                   | 1       | 1                       | 0                           | 0          |
| RFL89    | 801               | no                                                                               | yes (7)                                                                           | 1                             | 0          | 0                   | 0      | 1                   | 1       | 1                       | 0                           | 1          |
| RFL140*  | 637               | no                                                                               | yes (4)                                                                           | 0                             | 0          | 0                   | 0      | 1                   | 1       | 1                       | 0                           | 0          |
| RFL164*  | 391               | yes                                                                              | yes (6)                                                                           | 1                             | 0          | 0                   | 0      | 1                   | 1       | 1                       | 0                           | 0          |
| RFL166*  | 568               | no                                                                               | yes (2)                                                                           | 0                             | 0          | 0                   | 0      | 1*                  | 1*      | 1*                      | 0                           | 0          |
| RFL252*  | 396               | no                                                                               | yes (9)                                                                           | 1                             | 0          | 0                   | 0      | 1                   | 1       | 1                       | 0                           | 0          |
| RFL28    | 824               | no                                                                               | no                                                                                | 1*                            | 1*         | 1*                  | 1*     | 1                   | 1       | 1                       | 0                           | 0          |
| RFL29    | 790               | yes                                                                              | yes (7)                                                                           | 1                             | 0          | 0                   | 0      | 1                   | 1       | 1                       | 0                           | 1*         |
| RFL170   | 560               | no                                                                               | no                                                                                | 1*                            | 1*         | 1*                  | 0      | 1                   | 1       | 1                       | 0                           | 1          |

\* - non-functional sequence truncated or disrupted by a frameshift

**Supplementary Table 6.** List of oligos used in the study.

| Oligo Name                  | Experiment                                                             | Sequence 5'->3'                                                  | Reference |
|-----------------------------|------------------------------------------------------------------------|------------------------------------------------------------------|-----------|
| Ta_Actin_F                  | qRT-PCR                                                                | GCCACACTGTTCCAATCTATGA                                           |           |
| Ta_Actin_R                  | qRT-PCR                                                                | TGATGGAATTGTATGTCGCTTC                                           |           |
| P1 ( <i>orf256 + coxI</i> ) | qRT-PCR                                                                | ATGACAAATATGGTTTCGATGGC                                          |           |
| P2 ( <i>orf256</i> )        | qRT-PCR                                                                | GCTTGGGGATCCTGAATC                                               |           |
| P3 ( <i>coxI</i> )          | qRT-PCR                                                                | GCTGTCACTAGAACGGACC                                              |           |
| orf256_GSP1                 | 5'-RACE                                                                | GATTACGCCAAGCTTAAAACAGATCCTCCCTCATTCTCCCGCAGA                    |           |
| orf279_GSP1                 | 5'-RACE                                                                | GATTACGCCAAGCTTCATTACGTCTCGACAACCTCCACC                          |           |
| RFL29a_attB1_f              | REMSA                                                                  | GGGGACAAGTTTGTACAAAAAAGCAGGCTTCATGCCCCGCTTCTCTCCAC               |           |
| RFL29a_attB2_r              | REMSA                                                                  | GGGGACCACTTTGTACAAGAAAGCTGGGTCCTATTCAACTGTGGCTGCTTCTCCAGA        |           |
| RFL79a_attB1_f              | REMSA                                                                  | GGGGACCACTTTGTACAAGAAAGCTGGGTCTCATATAGCAAACCATTCAACTGTGGCTG<br>C |           |
| RFL79a_attB2_r              | REMSA                                                                  | GGGGACAAGTTTGTACAAAAAAGCAGGCTTCATGTTCTGCAGCGATGGCCCT             |           |
| BS RFL29a                   | REMSA                                                                  | CUUCACCUGUGCACUUUUUAUGUAU                                        |           |
| BS RFL79                    | REMSA                                                                  | CUGUAAAUCAAGAAUCCUCGAAGA                                         |           |
| BS orf256                   | REMSA                                                                  | CCACUAGCAGGUUUACUGCUUUCU                                         |           |
| WORF256_211_806_for         | Nothern Blot                                                           | ATCCCAAGCTCTAGCTCATTTAG                                          | 1         |
| WORF256_211_806_rev         | Nothern Blot                                                           | GGGGGCTGGAAGAGAAAAGAAT                                           | 1         |
| RFL capture_qPCR_for        | To confirm untargeted sequence depletion (chloroplast genome sequence) | TTTGGTTTCAAAGCCCTACG                                             |           |
| RFL capture_qPCR_rev        | To confirm untargeted sequence depletion                               | AACTTGGATACCATGAGGCG                                             |           |

|                    |                                 |                                  |  |
|--------------------|---------------------------------|----------------------------------|--|
|                    | (chloroplast genome sequence)   |                                  |  |
| ShBar_for          | Genotyping of transgenic plants | GCACCATCGTCAACCACTACA            |  |
| ShBar_rev          | Genotyping of transgenic plants | GTCCACTCCTGCGGTTCT               |  |
| ShBar_TaqMan probe | Genotyping of transgenic plants | FAM-CACGGTCAACTCCGTAC-MGB-NFQ    |  |
| GaMyb_for          | Genotyping of transgenic plants | GATCCGAATAGCTGGCTCAAGTAT         |  |
| GaMyb_rev          | Genotyping of transgenic plants | GGAGACTGCAGGTAGGGATCAAC          |  |
| GaMyb_TaqMan probe | Genotyping of transgenic plants | 5'VIC-CGTGGCTCCTGCGATGCAGC-TAMRA |  |

### Supplementary references

1. Song, J. S. & Hedgcoth, C. Influence of nuclear background on transcription of a chimeric gene (*orf256*) and *coxI* in fertile and cytoplasmic male-sterile wheats. *Genome* **37**, 203-209 (1994).
2. Bonhomme, S., Budar, F., Ferault, M. & Pelletier, G. A 2.5 kb NcoI fragment of Ogura radish mitochondrial DNA is correlated with cytoplasmic male-sterility in Brassica cybrids. *Curr Genet* **19**, 121-127 (1991).
3. Iwabuchi, M., Koizuka, N., Fujimoto, H., Sakai, T. & Imamura, J. Identification and expression of the kosen radish (*Raphanus sativus* cv. Kosen) homologue of the ogura radish CMS-associated gene, orf138. *Plant Molecular Biology* **39**, 183-188 (1999).
4. Nakajima, Y., Yamamoto, T., Muranaka, T. & Oeda, K. A novel orfB-related gene of carrot mitochondrial genomes that is associated with homeotic cytoplasmic male sterility (CMS). *Plant Molecular Biology* **46**, 99-107 (2001).
5. LHomme, Y., Stahl, R. J., Li, X. Q., Hameed, A. & Brown, G. G. Brassica nap cytoplasmic male sterility is associated with expression of a mtDNA region containing a chimeric gene similar to the pol CMS-associated orf224 gene. *Curr Genet* **31**, 325-335 (1997).
6. Kohler, R. H., Horn, R., Lossl, A. & Zetsche, K. Cytoplasmic male-sterility in sunflower is correlated with the co-transcription of a new open reading frame with the *Atpa* Gene. *Mol Gen Genet* **227**, 369-376 (1991).
7. Emanuelsson, O., Nielsen, H., Brunak, S. & von Heijne, G. Predicting subcellular localization of proteins based on their N-terminal amino acid sequence. *J Mol Biol* **300**, 1005-1016 (2000).
8. Jia, J. *et al.* Aegilops tauschii draft genome sequence reveals a gene repertoire for wheat adaptation. *Nature* **496**, 91-95 (2013).
9. Mayer, K. F. X. *et al.* A chromosome-based draft sequence of the hexaploid bread wheat (*Triticum aestivum*) genome. *Science* **345** (2014).
10. Brenchley, R. *et al.* Analysis of the bread wheat genome using whole-genome shotgun sequencing. *Nature* **491**, 705-710 (2012).
11. Krasileva, K. V. *et al.* Separating homeologs by phasing in the tetraploid wheat transcriptome. *Genome Biol* **14**, R66 (2013).
12. Ling, H. Q. *et al.* Draft genome of the wheat A-genome progenitor *Triticum urartu*. *Nature* **496**, 87-90 (2013).
13. Mayer, K. F. X. *et al.* A physical, genetic and functional sequence assembly of the barley genome. *Nature* **491**, 711-716 (2012).
14. Farrell, J. D., Byrne, S., Paina, C. & Asp, T. *De novo* assembly of the perennial ryegrass transcriptome using an RNA-Seq strategy. *PLoS ONE* **9**, e103567 (2014).
15. Martis, M. M. *et al.* Reticulate evolution of the rye genome. *Plant Cell* **25**, 3685-3698 (2013).
16. Ouyang, S. *et al.* The TIGR Rice Genome Annotation Resource: Improvements and new features. *Nucleic Acids Res* **35**, D883-D887 (2007).
17. Kawahara, Y. *et al.* Improvement of the *Oryza sativa* Nipponbare reference genome using next generation sequence and optical map data. *Rice* **6**, 4 (2013).
18. Sakai, H. *et al.* Rice Annotation Project Database (RAP-DB): an integrative and interactive database for rice genomics. *Plant Cell Physiol* **54**, e6 (2013).
19. Jacquemin, J., Bhatia, D., Singh, K. & Wing, R. A. The International Oryza Map Alignment Project: development of a genus-wide comparative genomics platform to help solve the 9 billion-people question. *Current Opinion in Plant Biology* **16**, 147-156 (2013).

20. Chen, J. F. *et al.* Whole-genome sequencing of *Oryza brachyantha* reveals mechanisms underlying *Oryza* genome evolution. *Nature Commun* **4**, 1595 (2013).
21. Wang, M. *et al.* The genome sequence of African rice (*Oryza glaberrima*) and evidence for independent domestication. *Nat Genet* **46**, 982-988 (2014).
22. The International Brachypodium Initiative. Genome sequencing and analysis of the model grass *Brachypodium distachyon*. *Nature* **463**, 763-768 (2010).
23. Cannarozzi, G. *et al.* Genome and transcriptome sequencing identifies breeding targets in the orphan crop tef (*Eragrostis tef*). *BMC Genomics* **15**, doi:10.1186/1471-2164-15-581 (2014).
24. Bennetzen, J. L. *et al.* Reference genome sequence of the model plant *Setaria*. *Nat Biotechnol* **30**, 555-561 (2012).
25. Paterson, A. H. *et al.* The *Sorghum bicolor* genome and the diversification of grasses. *Nature* **457**, 551-556 (2009).
26. Schnable, P. S. *et al.* The B73 maize genome: complexity, diversity, and dynamics. *Science* **326**, 1112-1115 (2009).
27. Fujii, S., Bond, C. S. & Small, I. D. Selection patterns on restorer-like genes reveal a conflict between nuclear and mitochondrial genomes throughout angiosperm evolution. *P Natl Acad Sci USA* **108**, 1723-1728 (2011).
28. Mace, E. S. *et al.* Whole-genome sequencing reveals untapped genetic potential in Africa's indigenous cereal crop sorghum. *Nat Commun* **4**, 2320 (2013).
